# Supplementary material for: Reduced Numbers and Impaired Function of Regulatory T Cells in Peripheral Blood of Ischemic Stroke Patients
Source: Hindawi journal article supplement (doi:10.1155/2016/2974605), 2016-01-01
Supplement: f1 [file 2974605.f1.pdf]

**Supplement**

Fig. S1

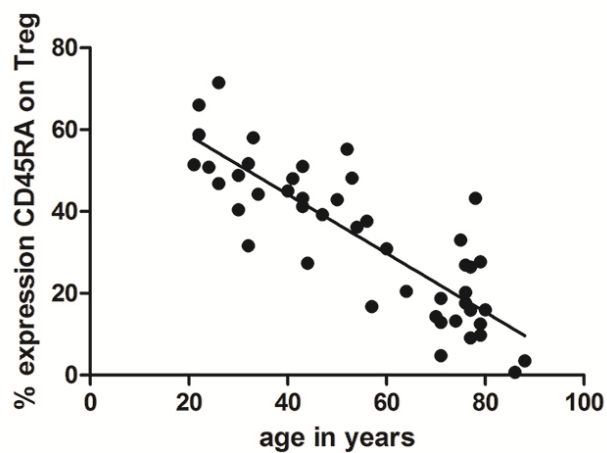

**Suppl. Figure S1.** CD45RA expression on Treg correlates negatively with age in humans.

Human, peripheral blood: The percentage of CD45RA expression was determined on CD4<sup>+</sup>CD25<sup>+</sup>CD49d<sup>-</sup>FoxP3<sup>+</sup> Treg and correlated negatively to age for a total of 45 healthy controls (age from 21 to 88 years). Pearson  $r=-0.8422$ ;  $p<0.0001$

Fig. S2

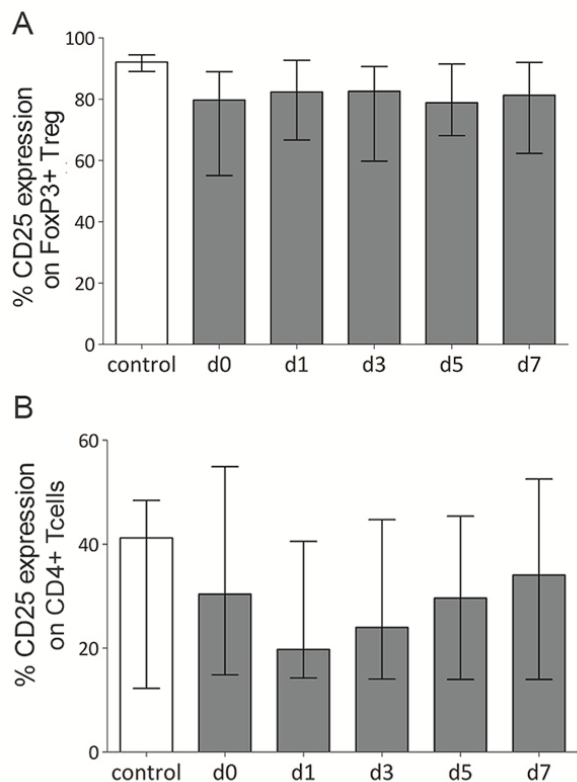**Suppl. Figure S2.****A) Expression of CD25 on cell surface of Treg**

Cytometric analysis of nonstroke controls (white bars) and stroke patients (dark grey bars) were performed for CD25<sup>+</sup> expressing Treg ( $n_{\text{control, d0, 1, 3, 5, 7}} = 15, 35, 35, 34, 32, 22$ ), shown as the percentage of FoxP3<sup>+</sup> cells. Medians and interquartile ranges are provided.

**B) Analysis of CD4<sup>+</sup>CD25<sup>+</sup> cells**

Analysis of nonstroke controls (white bars) and stroke patients (dark grey bars) were performed for CD25<sup>+</sup> expressing CD4<sup>+</sup> cells ( $n_{\text{control, d0, 1, 3, 5, 7}} = 14, 35, 34, 33, 32, 25$ ), shown as the percentage of CD4<sup>+</sup> cells. Medians and interquartile ranges are provided.
